# Supplementary material for: A novel pH “off–on” fluorescent probe for lysosome imaging
Source: Royal Society of Chemistry journal article supplement (doi:10.1039/c3ra41898g), 2013-01-01
Supplement: c3ra41898g.pdf [file c3ra41898g.pdf]

## Supporting Information

### A novel pH “off-on” fluorescent probes for lysosome imaging

Laizhong Chen, Jing Li, Zhenzhen Liu, Zhao Ma, Wei Zhang, Lupei Du, Wenfang Xu, Hao Fang and

Minyong Li\*

*Department of Medicinal Chemistry, Key Laboratory of Chemical Biology of Natural Products (MOE), School of Pharmacy, Shandong University, Jinan, Shandong 250012, China*

\*Tel./fax: +86-531-8838-2076, E-mail: [mli@sdu.edu.cn](mailto:mli@sdu.edu.cn)

### Table of Contents

|                                                                   |    |
|-------------------------------------------------------------------|----|
| 1. Co-staining of PC-3 cells with LTP and LT Red .....            | S2 |
| 2. <sup>1</sup> H NMR, <sup>13</sup> C NMR and HR-MS of LTP ..... | S2 |
| 3. HPLC spectrum of LTP .....                                     | S4 |

### 1. Co-staining of PC-3 cells with LTP and LT Red

PC-3 cells were grown in RPMI-1640 medium supplemented with 10% (v/v) fetal bovine serum in an atmosphere of 5% CO<sub>2</sub>, 95% air at 37 °C. Cells were adjusted to the density of 80,000/cm<sup>2</sup> and incubated for 32 h, then washed with cell culture medium twice. The solution of LTP (7 μM) and LT Red (70 nM) in cell culture medium were added and incubated at 37 °C for 1h. Then the samples were readily to be detected by confocal microscopy (Zeiss LSM 700). The colocalization coefficient was calculated by using imageJ software.

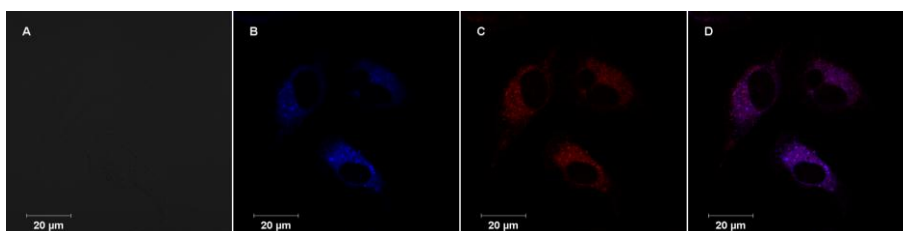

**Figure S1** Co-staining of PC-3 cells with LTP (7 $\mu$ M) and LT Red (70 nM). A, bright-field image. B, cells stained by LTP, Ex 405nm; C, cells stained by LT Red, Ex 555nm; D, merged images. All images were taken under 63 $\times$  oil immersion objective.

## 2. <sup>1</sup>H NMR, <sup>13</sup>C NMR and HR-MS of LTP

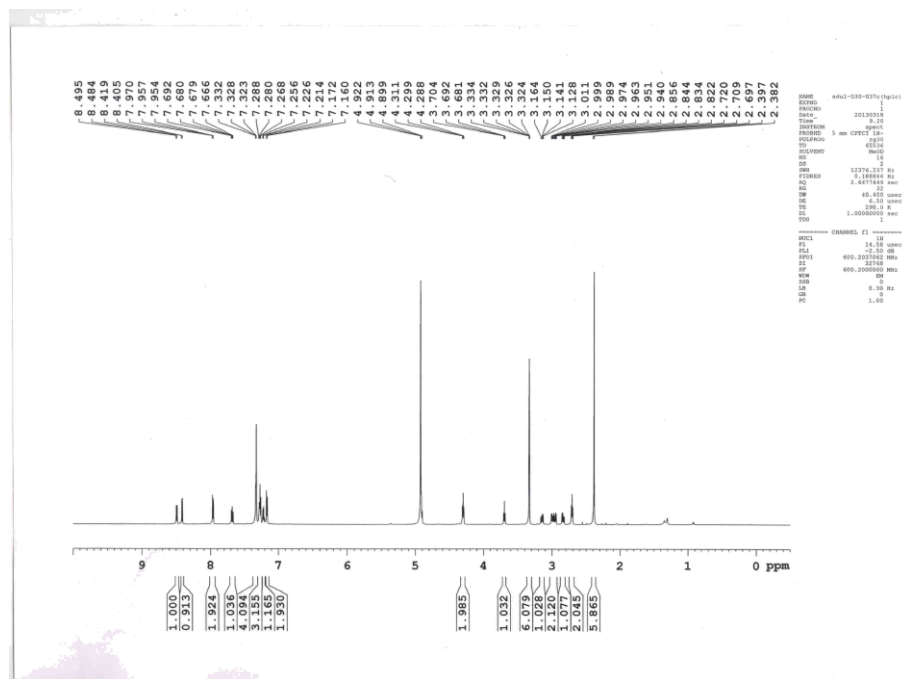

Figure S2  $^1\text{H}$  NMR (300 MHz) spectrum of **LTP**.

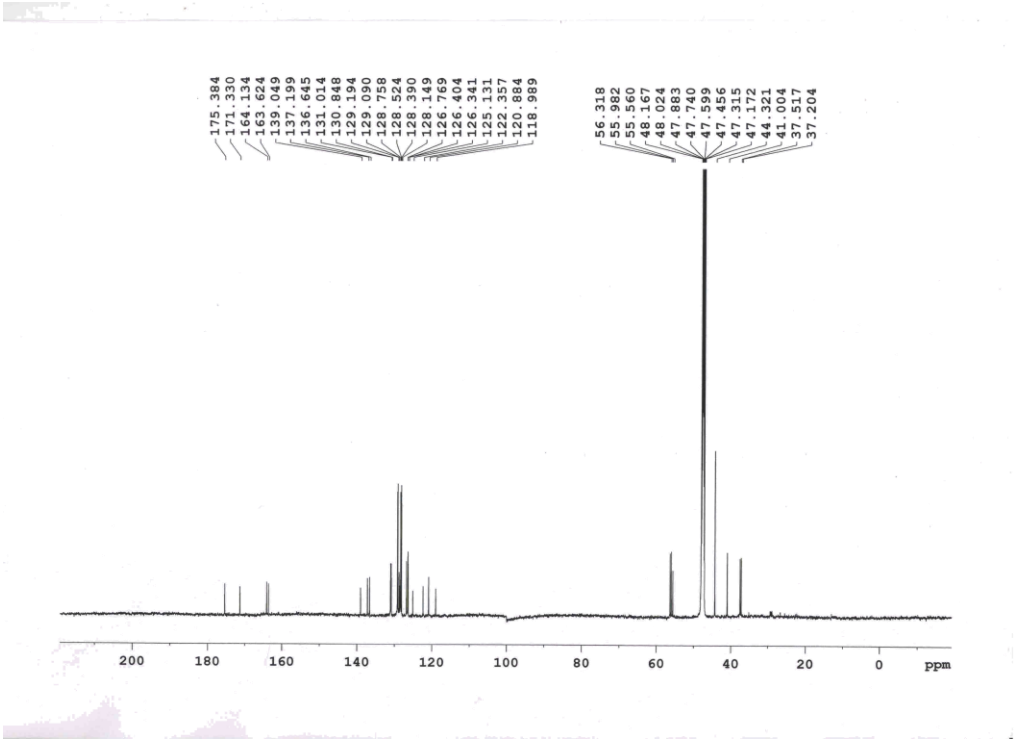

Figure S3 <sup>13</sup>C NMR (150 MHz) spectrum of LTP.

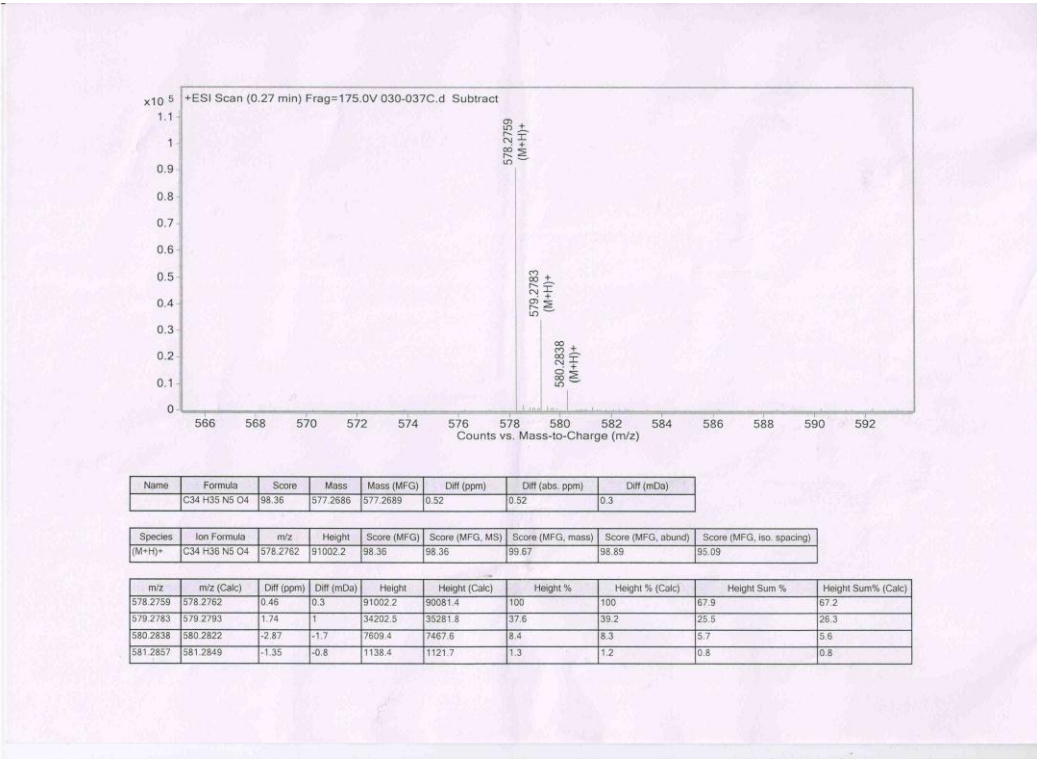

Figure S4 HR-MS spectrum of LTP.

### 3. HPLC spectrum of LTP

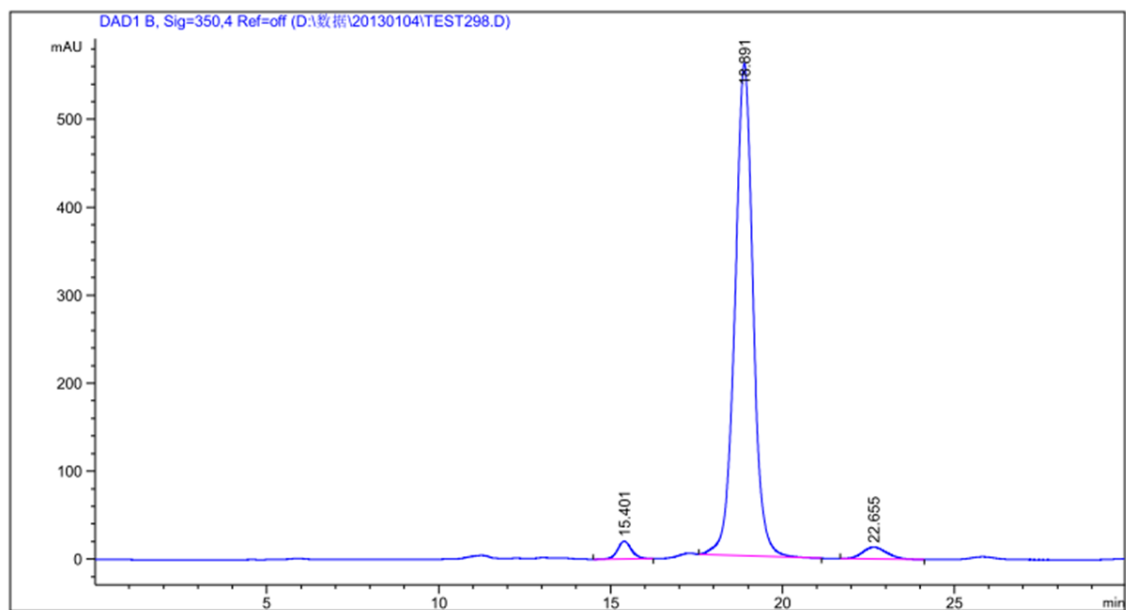

*Figure S5* HPLC spectrum of **LTP**. Purity of **LTP** was determined by RP-HPLC method with Agilent 1260, using the Luna C18 (250×10.0 mm, 5 $\mu$ m) as the solid phase, methanol-water-diethylamine (81.85:18:0.15) as the mobile phase. The detection wavelength was 350 nm and the flow rate was 1.5 mL/min.
